# Supplementary material for: Comprehensive analysis of the transcriptional landscape of the human FMR1 gene reveals two new long noncoding RNAs differentially expressed in Fragile X syndrome and Fragile X-associated tremor/ataxia syndrome
Source: PubMed Central journal article supplement (PMC3898532; doi:10.1007/s00439-013-1356-6), 2013-09-05
Supplement: 439_2013_1356_MOESM1_ESM.pdf [file 439_2013_1356_MOESM1_ESM.pdf]

## SUPPLEMENTARY FIGURES AND LEGENDS

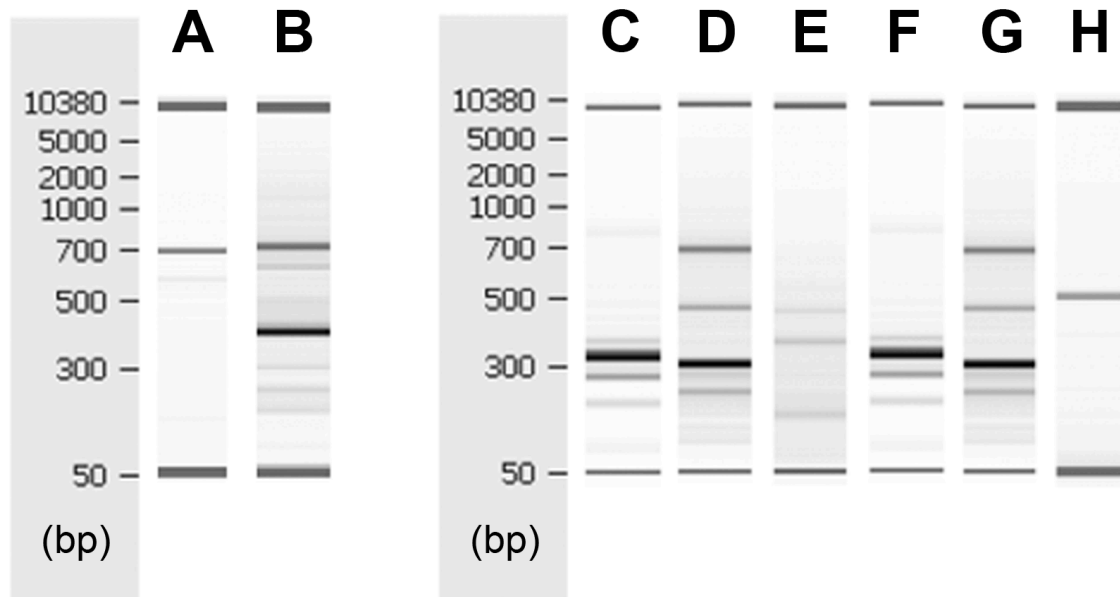

3'RACE: (A)=-1kb      5'RACE (C)=exon1 (D)=exon5 (E)=exon17  
5'RACE: (B)=-500bp    3'RACE (F)=exon1 (G)=exon5 (H)=exon17

**Online Resource 1. Visualization of 5' and 3'RACE PCR products by capillary electrophoresis.** 3'RACE (A) and 5'RACE (B), to detect sense-oriented transcripts, were performed 1kb and 0.5kb upstream of the *FMRI* transcription start site, respectively, and the PCR products were visualized by capillary electrophoresis. In order to detect antisense transcripts, 5'RACE (C-E) and 3'RACE (F-H) were performed on exon 1, exon 5 and exon 17 and the size of PCR products was detected with capillary electrophoresis.

## **FMR5**

5'\_(+1)GGTACTAAGTTCAATGCTGGCAGTCGTTTCTTCTTTTTTTTTCTTTTCTGTTTTGCTCA  
CCGATTTCTCGTTAGCACTTAGCACAGTGTCTGGCACACGATAGATGCTCCGTCAACTTCT  
CAGTTGGATACCAGCATCCCGAAGGGAACATGGATTAAGGCAGCTATAAGCACGGTGTA  
AACAGGAATAAGAAAAAGTTGAGGTTTGTTCACAGTGGAAATGTAAAGGGTTGCAAGGAG  
GTGCATCGGCCCTGTGGACAGGACGCATGACTGCTACACACGTGTTACCCACCCTCT  
GGCACAGGGTGACATACAGTAGGGGCAGAAATGAACCTCAAGTGCTTAACACAATTTTAA  
AAAAATATATAGTCAAAGTGAAAGTATGAAATGAGTTGAGGAAAGGCGAGTACGTGGGTCA  
AAGCTGGGTCTGAGGAAAAGGCTCACATTTTGAAGTCCCGACTCAATCCATGTCCCTTAAAG  
GGCACAGGGTGTCTCCACAGGGCCGCCAAAATCTGGTGAGAGAGGGCGTAGACGCCTC  
ACTTTCTGCCTCTACGGGTCAAAAAGCCTGGGTACCCTGTTGCCACTGTTCCCTAGTTC  
AAAGTCTTCTTCTGTCTAATCCTTACCCCTATTCTCGCTTCCACTCCACCTCCCGCTCAG  
TCAGACTGCGCTACTTTGAACCGGACCAAACCAAACCAAACCAAACCAAACCAAACAGAC  
CAGACACCCCTCCCGCGGAATCCCAGAGAGGCCGAACCTGGGATAACCGGATGCATTTGA  
TTTCCACGCCACTGAGTGCACCTCTGCAGAAATGGGCGTTCTGGCCCTCGCGAGGCAGT  
GCGACCTGTACCCGCCCTTCAGCCTTCCCGCCCTCACCA(+887)

## **FMR6**

5'\_(+1)AGGGGGAGGAAGAGGACAAGGAGGAAGAGGACGTGGAGGAGGCTTCAAAGGAAA  
CGACGATCACTCCCGAACAGATAATCGTCCACGTAATCCAAGAGAGGCTAAAGGAAGAAC  
AACAGATGGATCCCTTCAGATCAGAGTTGACTGCAATAATGAAAGGAGTGTCCACACTAAA  
ACATTACAGAATACCTCCAGTGAAGGTAGTCGGCTGCGCACGGGTAAAGATCGTAACCAG  
AAGAAAGAGAAGCCAGACAGCGTGGATGGTCAGCAACCACTCGTGAATGGAGTACCCTAA  
ACTGCATAATTCTGAAGTTATATTTCTATACCATTTCCGTAATTCTTATTCCATATTAGAAAA  
CTTTGTTAGGCCAAAGACAAATAGTAGGCAAGATGGCACAGGGCATGAAATGAACACAAAT  
TATGCTAAGAATTTTTATTTTTGGTATTGGCCATAAGCAACAATTTTCAGATTTGCACAAA  
AAGATACCTTAAAATTTGAAACATTGCTTTTAAACTACTTAGCACTTCAGGGCAGATTTTAG  
TTTTATTTTCTAAAGTACTGAGCAGTGATATTCTTTGTTAATTTGGACCATTTTCTGCATTG  
GGTGATCATTACCAGTACATTCTCAGTTTTTCTTAATATA(+650)\_3'

**Online Resource 2. Sequence of *FMR5* and *FMR6*.** Alignment of Deep-RACE reads to the human genome identifies *FMR5* and *FMR6*.

**A**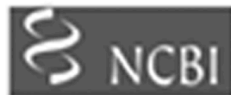

## ORF Finder (Open Reading Frame Finder)

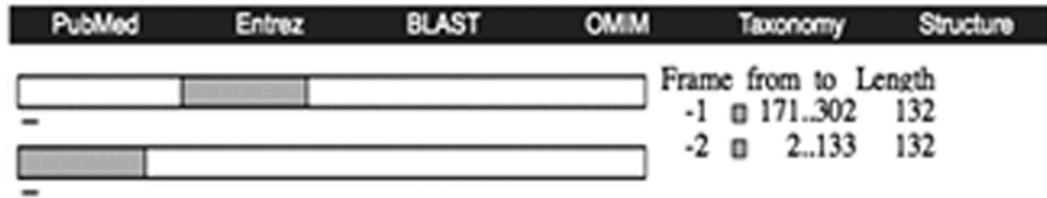**B**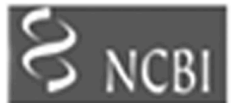

## ORF Finder (Open Reading Frame Finder)

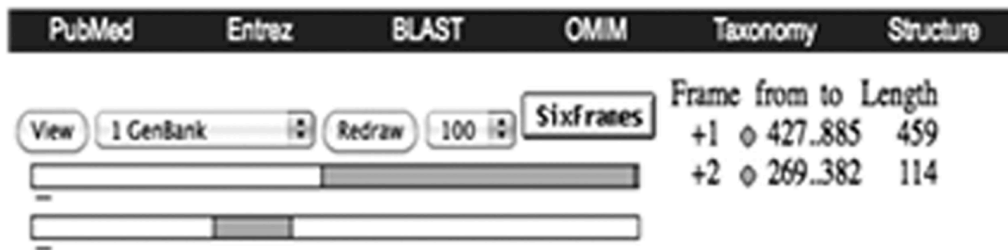

**Online Resource 3. Interrogation of open reading frames (ORFs) in *FMR5* and *FMR6*.** The entire sequence of *FMR6* was interrogated for the presence of ORF using the NCBI's ORF Finder program. (A) Two ORFs of short length (132 nt each) were found in *FMR6*. (B) The partial sequence of *FMR5* contains two putative ORFs of 114 nt and 459 nt.

**Online Resource 3. List of primers used in 5'RACE protocol.**

| <b>Name</b>  | <b>Sequence</b>      | <b>Application</b>      |
|--------------|----------------------|-------------------------|
| GSP1- Set 2  | ACACCGTGCTTATAGCTGCC | 5'RACE-sense RT         |
| GSP2- Set 2  | CACCTCCTTGCAACCCTTTA | 5'RACE-sense PCR1       |
| GSP3- Set 2  | TAGCAGTCATGCGTCCTGTC | 5'RACE-sense nested PCR |
| GSP1-Exon 17 | AGTAGGCAAGATGGCACAGG | 5'RACE-AS RT            |
| GSP2-Exon 17 | CACAGGGCATGAAATGAACA | 5'RACE-AS PCR1          |
| GSP3-Exon 17 | GGGCATGAAATGAACACAAA | 5'RACE-AS nested PCR    |
| GSP1- Set 1  | GTAGACGCCTCACCTTCTGC | 5'RACE-AS RT            |
| GSP2- Set 1  | CTCACCTTCTGCCTCTACGG | 5'RACE-AS PCR1          |
| GSP3- Set 1  | ACCAAACCAAACCAAACCAA | 5'RACE-AS nested PCR    |
| GSP1- Set 2  | GGCAGCTATAAGCACGGTGT | 5'RACE-AS RT            |
| GSP2- Set 2  | TAAAGGGTTGCAAGGAGGTG | 5'RACE-AS PCR 1         |
| GSP3- Set 2  | GACAGGACGCATGACTGCTA | 5'RACE-AS nested PCR    |

**Online Resource 4. List of primers used in 3'RACE protocol.**

| <b>Name</b>   | <b>Sequence</b>       | <b>Application</b>             |
|---------------|-----------------------|--------------------------------|
| GSP1- Set 1   | GTAGACGCCTCACCTTCTGC  | 3'RACE-sense PCR1              |
| GSP2- Set 1   | CTCACCTTCTTGCCTCTACGG | 3'RACE-sense nested PCR        |
| GSP1- Set 1   | CACCTCCTTGCAACCCTTTA  | 3'RACE-AS PCR1                 |
| GSP2- Set 1   | ACACCGTGCTTATAGCTGCC  | 3'RACE-AS nested PCR           |
| GSP1- Set 2   | CCGTAGAGGCAGAAGGTGAG  | 3'RACE-AS PCR1                 |
| GSP2- Set 2   | GCAGAAGGTGAGGCGTCTAC  | 3'RACE-AS nested PCR           |
| Exon 1        | CACCAGCTCCTCCATCTTCT  | 3'RACE-AS PCR1                 |
| Exon 1-Nested | TTCTCTTCAGCCCTGCTAGC  | 3'RACE-AS nested PCR           |
| Exon 5        | CTTTTCTGGCAGGTTTGTTG  | 3'RACE-AS PCR1 &<br>nested PCR |
| Exon 17       | AGCCGACTACCTTCACTGGA  | 3'RACE-AS PCR1 &<br>nested PCR |

### Online Resource 5. Description of brain tissue samples

| <b>Sample ID</b> | <b>Brain Region</b>      | <b>Disease</b> | <b>Source</b> | <b>Age/Sex</b> |
|------------------|--------------------------|----------------|---------------|----------------|
| 1790             | Occipital cortex         | Control        | NICHD         | 13/M           |
| 5391             | Prefrontal cortex        | Control        | NICHD         | 8/M            |
| 5558             | Prefrontal cortex        | Control        | NICHD         | 5/M            |
| 914              | Prefrontal cortex        | Control        | NICHD         | 20/M           |
| 1024             | Prefrontal cortex        | Control        | NICHD         | 14/M           |
| 1158             | Prefrontal cortex        | Control        | NICHD         | 16/M           |
| 1347             | Prefrontal cortex        | Control        | NICHD         | 19/F           |
| 1846             | Prefrontal cortex        | Control        | NICHD         | 20/F           |
| 4669             | Prefrontal cortex        | Control        | NICHD         | 16/M           |
| 5168             | Prefrontal cortex        | Control        | NICHD         | 15/F           |
| 5173             | Prefrontal cortex        | Control        | NICHD         | 10/F           |
| 4806             | Occipital cortex         | Full mutation  | NICHD         | 9/M            |
| 5319             | Occipital cortex         | Full mutation  | NICHD         | 71/M           |
| 1421             | Frontal cortex           | Full mutation  | NICHD         | 69/M           |
| 1031-08GP        | Cerebellum               | Full mutation  | MIND          | 57/M           |
| 1033-08WS        | Cerebellum               | Full mutation  | MIND          | 74/M           |
| 1031-09LZ        | Cerebellum               | Full mutation  | MIND          | 64/M           |
| JS-03            | Cerebellum               | Full mutation  | MIND          | 25/M           |
| 4664             | Occipital cortex         | Premutation    | NICHD         | 71/M           |
| 4751             | Occipital cortex         | Premutation    | NICHD         | 21/M           |
| 5212             | Parieto-occipital cortex | Premutation    | NICHD         | 80/M           |
| 4555             | Occipital cortex         | Premutation    | NICHD         | 80/M           |
| 5006             | Parietal cortex          | Premutation    | NICHD         | 85/M           |

### Online Resource 6. List of primers used for quantitative RT-PCR.

| <b>Name</b>  | <b>Sequence</b>                   | <b>Application</b>                             |
|--------------|-----------------------------------|------------------------------------------------|
| FMR1         | Hs00924547_m1 (Applied Biosystem) | qPCR - Taqman                                  |
| FMR4 RT      | ATTGCTGGCAGTCGTTTCTT              | FMR4 Strand-specific RT                        |
| FMR4 (FW)    | ACCAAACCAAACCAAACCAA              | qPCR - SYBR Green                              |
| FMR4 (REV)   | GTGGGAAATCAAATGCATCC              | qPCR - SYBR Green                              |
| FMR5         | GTTATCCCAGTTCGGCCTCT              | FMR5 Strand-specific RT                        |
| FMR5 (FW)    | CGAGTACGTGGGTCAAAGCT              | qPCR - Taqman                                  |
| FMR5 (REV)   | GACATGGATTGAGTCGGGATCT            | qPCR - Taqman                                  |
| FMR5 (Probe) | CAAATGTGAGCCTTTCCTC               | qPCR - Taqman                                  |
| FMR6 (FW)    | AGCACTTCAGGGCAGATTTT              | qPCR - SYBR Green &<br>FMR6 Strand-specific RT |
| FMR6 (REV)   | TGGTGAATGATCACCCAATG              | qPCR - SYBR Green                              |
| G6PD         | Cf02646199_m1 (Applied Biosystem) | qPCR - Taqman                                  |
| CYC          | Cf03986523_gh (Applied Biosystem) | qPCR - Taqman                                  |
